# Supplementary material
Source: PubMed Central journal article supplement (PMC4860967)
Supplement: celldisc201548-s1.pdf [file celldisc201548-s1.pdf]

**a**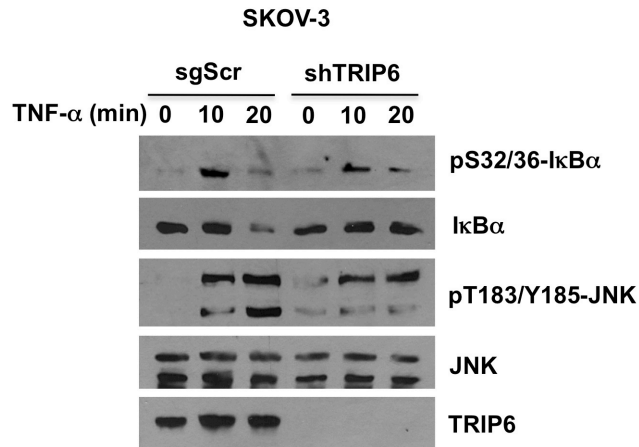**b**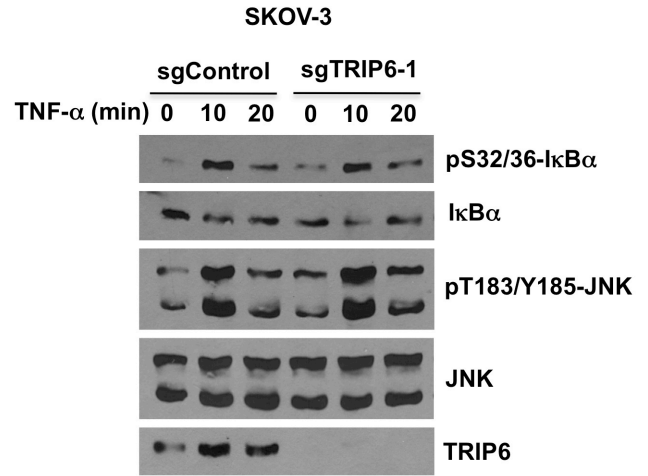

**Supplementary Figure S1. Depletion of TRIP6 only mildly or barely affects TNF- $\alpha$ -induced I $\kappa$ B $\alpha$  phosphorylation and JNK activation.** SKOV-3 cells stably expressing shRNA (shScr, shTRIP6) (a) or Cas9/sgRNA (sgControl, sgTRIP6-1) (b) were treated with 10 ng/ml TNF- $\alpha$  in 10% fetal bovine serum-containing medium for 10 or 20 min. Immunoblotting was performed to detect the levels of phosphorylated or total I $\kappa$ B $\alpha$ , JNK or TRIP6 in the whole cell lysates.
